# Supplementary material
Source: publisher figshare collection journal article supplement (https://frontiersin.figshare.com/ndownloader/files/27921036)

# Full Blot for Figure 1F: Initial Probe

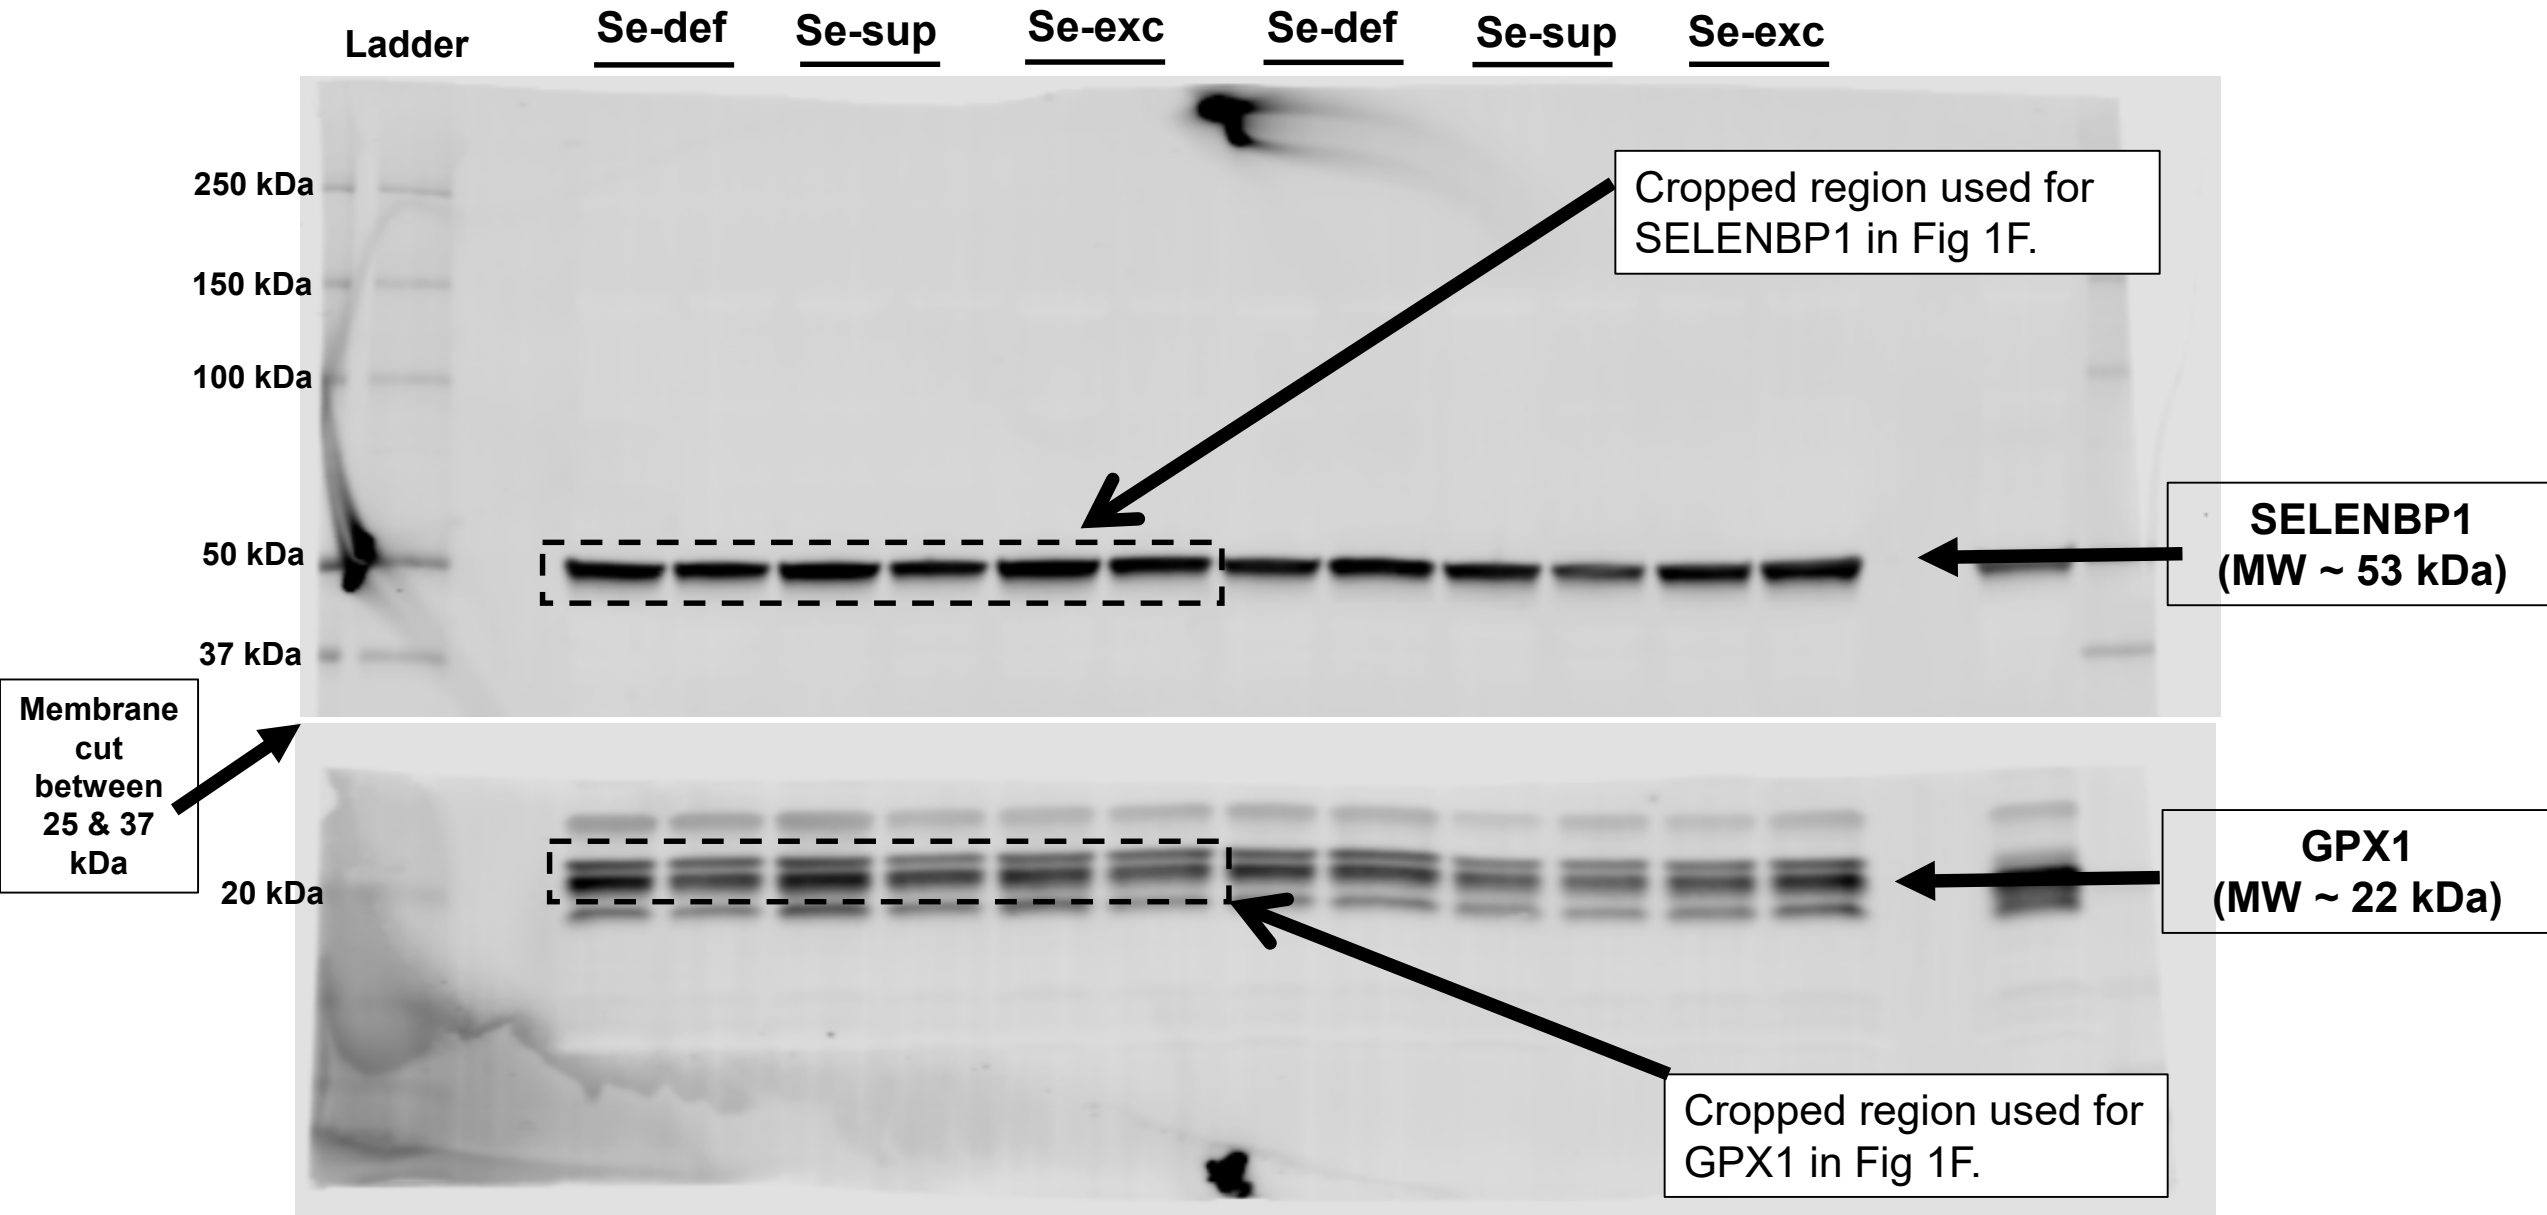

# Full Blot for Figure 1F: Reprobe #1

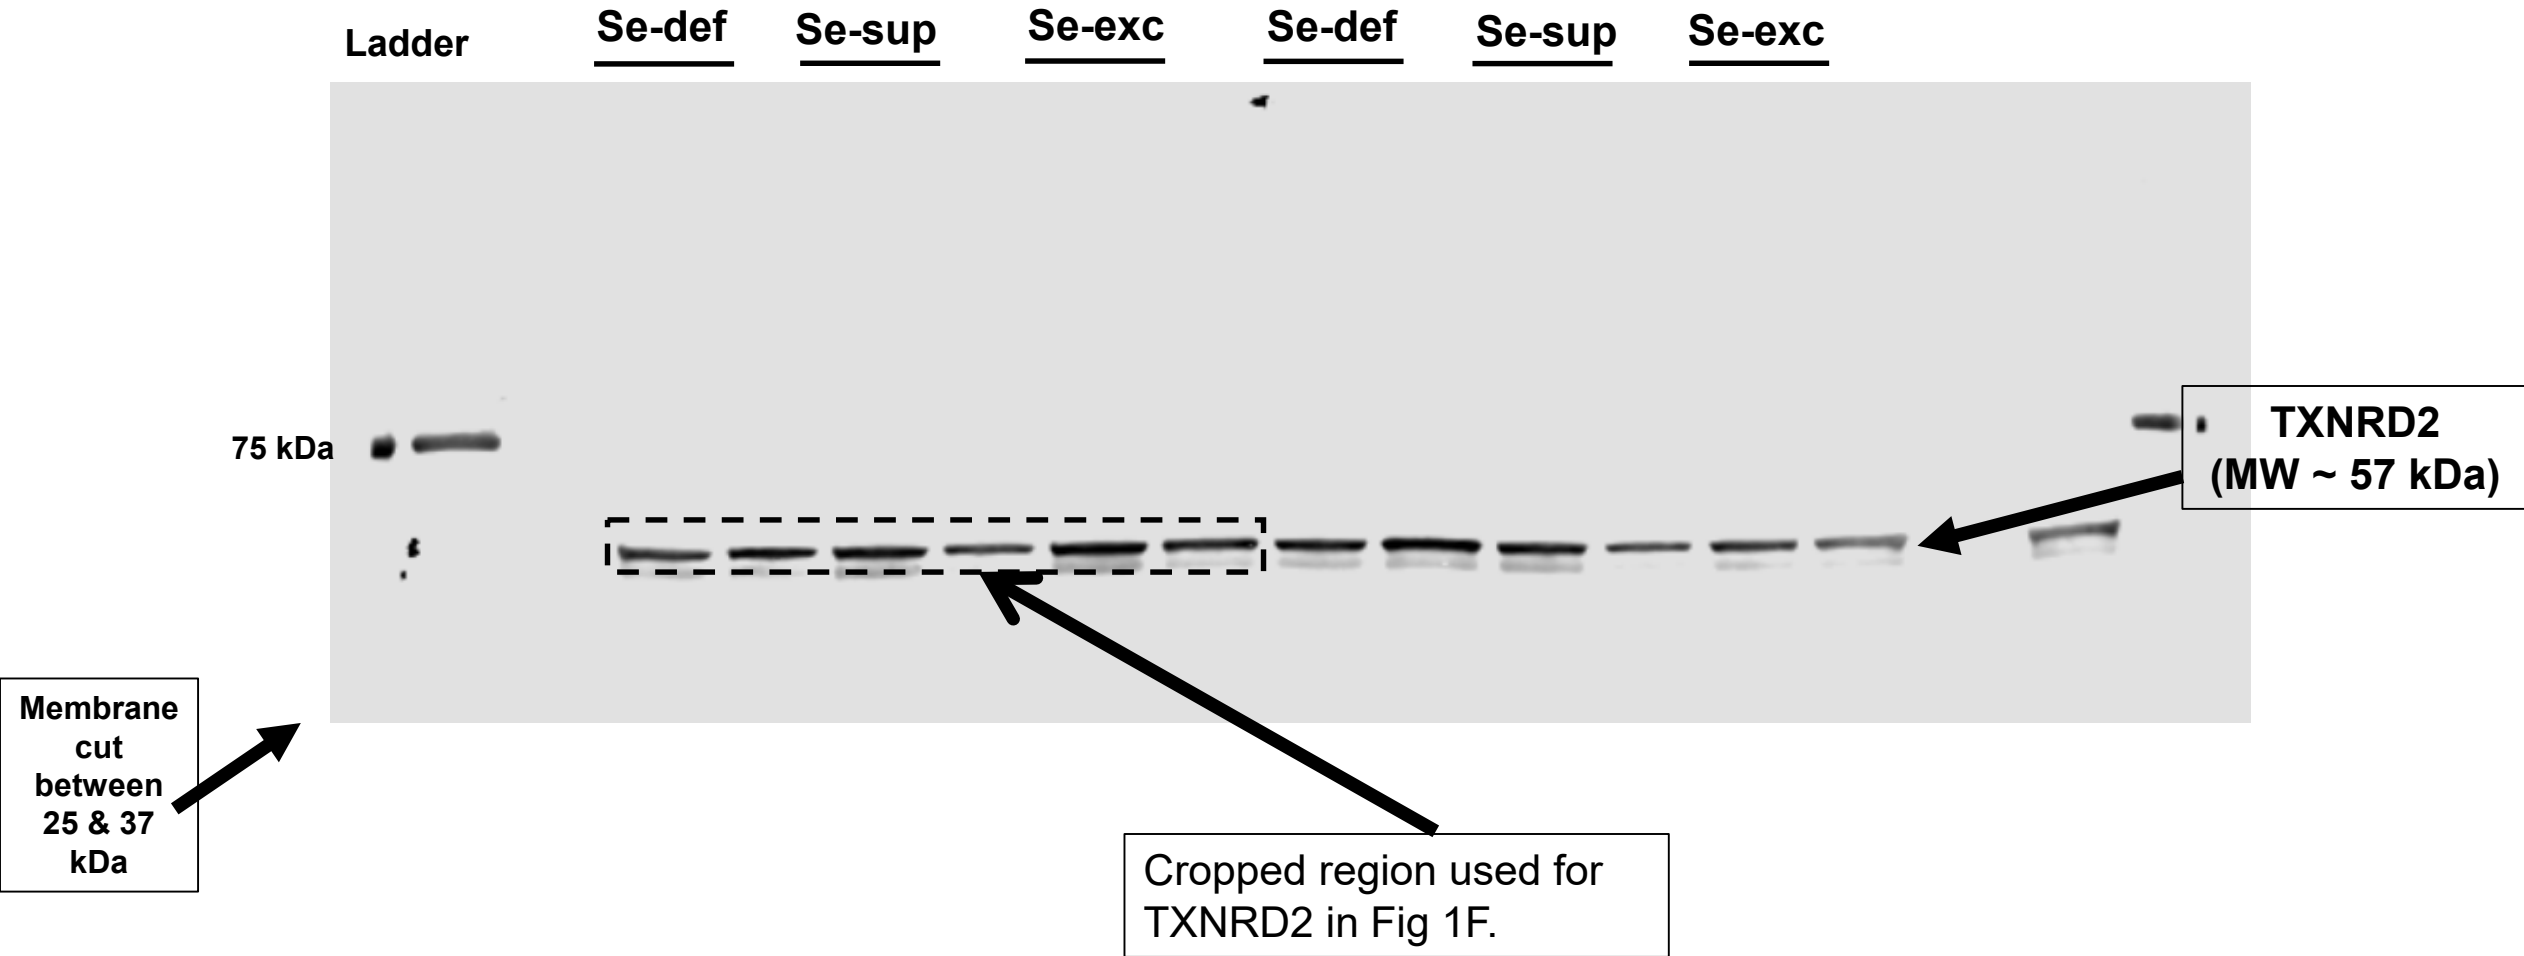

NOTE: TXNRD2 was detected in the 800 channel of the Licor Odyssey System. Only the 75 kDa band of the ladder was visible in this detection channel.

# Full Blot for Figure 1F: Reprobe #2

Ladder      Se-def    Se-sup    Se-exc    Se-def    Se-sup    Se-exc

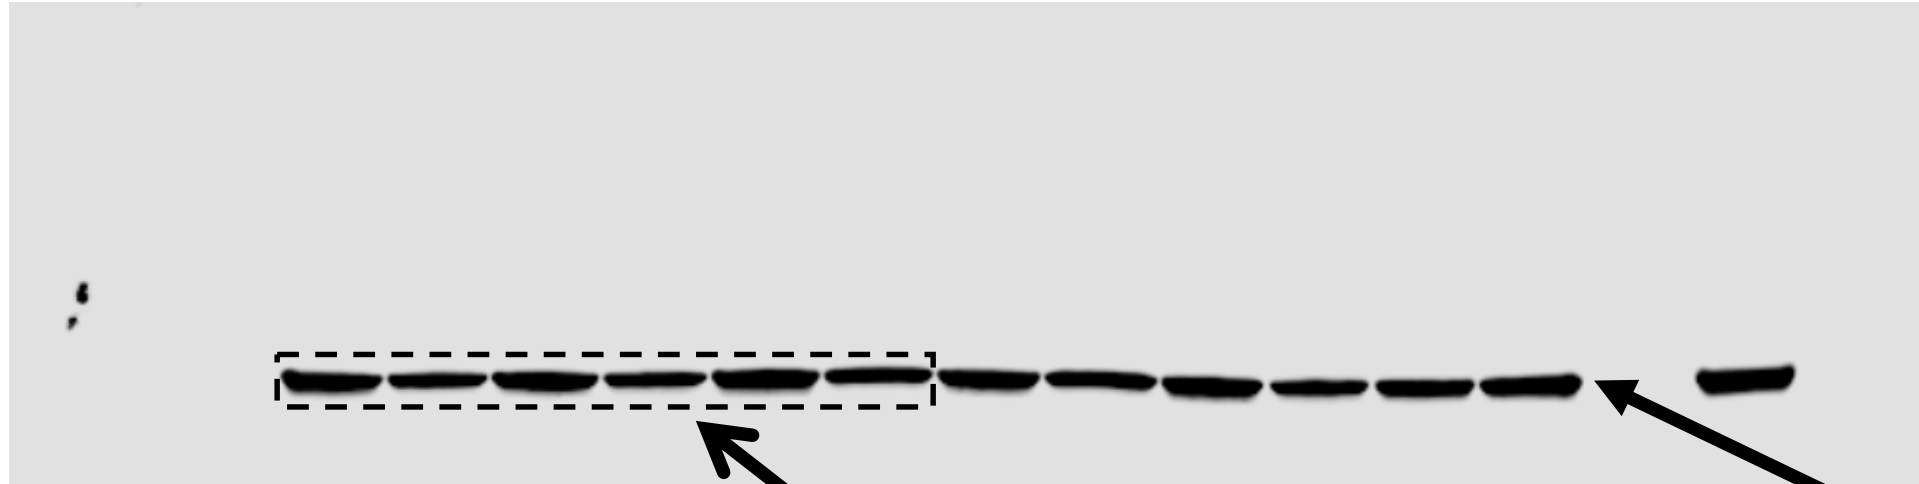

Membrane  
cut  
between  
25 & 37  
kDa

Cropped region used for  
 $\beta$ -actin in Fig 1F.

$\beta$ -actin  
(MW ~ 42 kDa)

NOTE:  $\beta$ -actin was detected in the 800 channel of the Licor Odyssey System. Due to the intense signal of  $\beta$ -actin, the 75 kDa band of the ladder was not visible unless the signal was increased.

# Full Blot for Figure 1H: Initial Probe (680 channel)

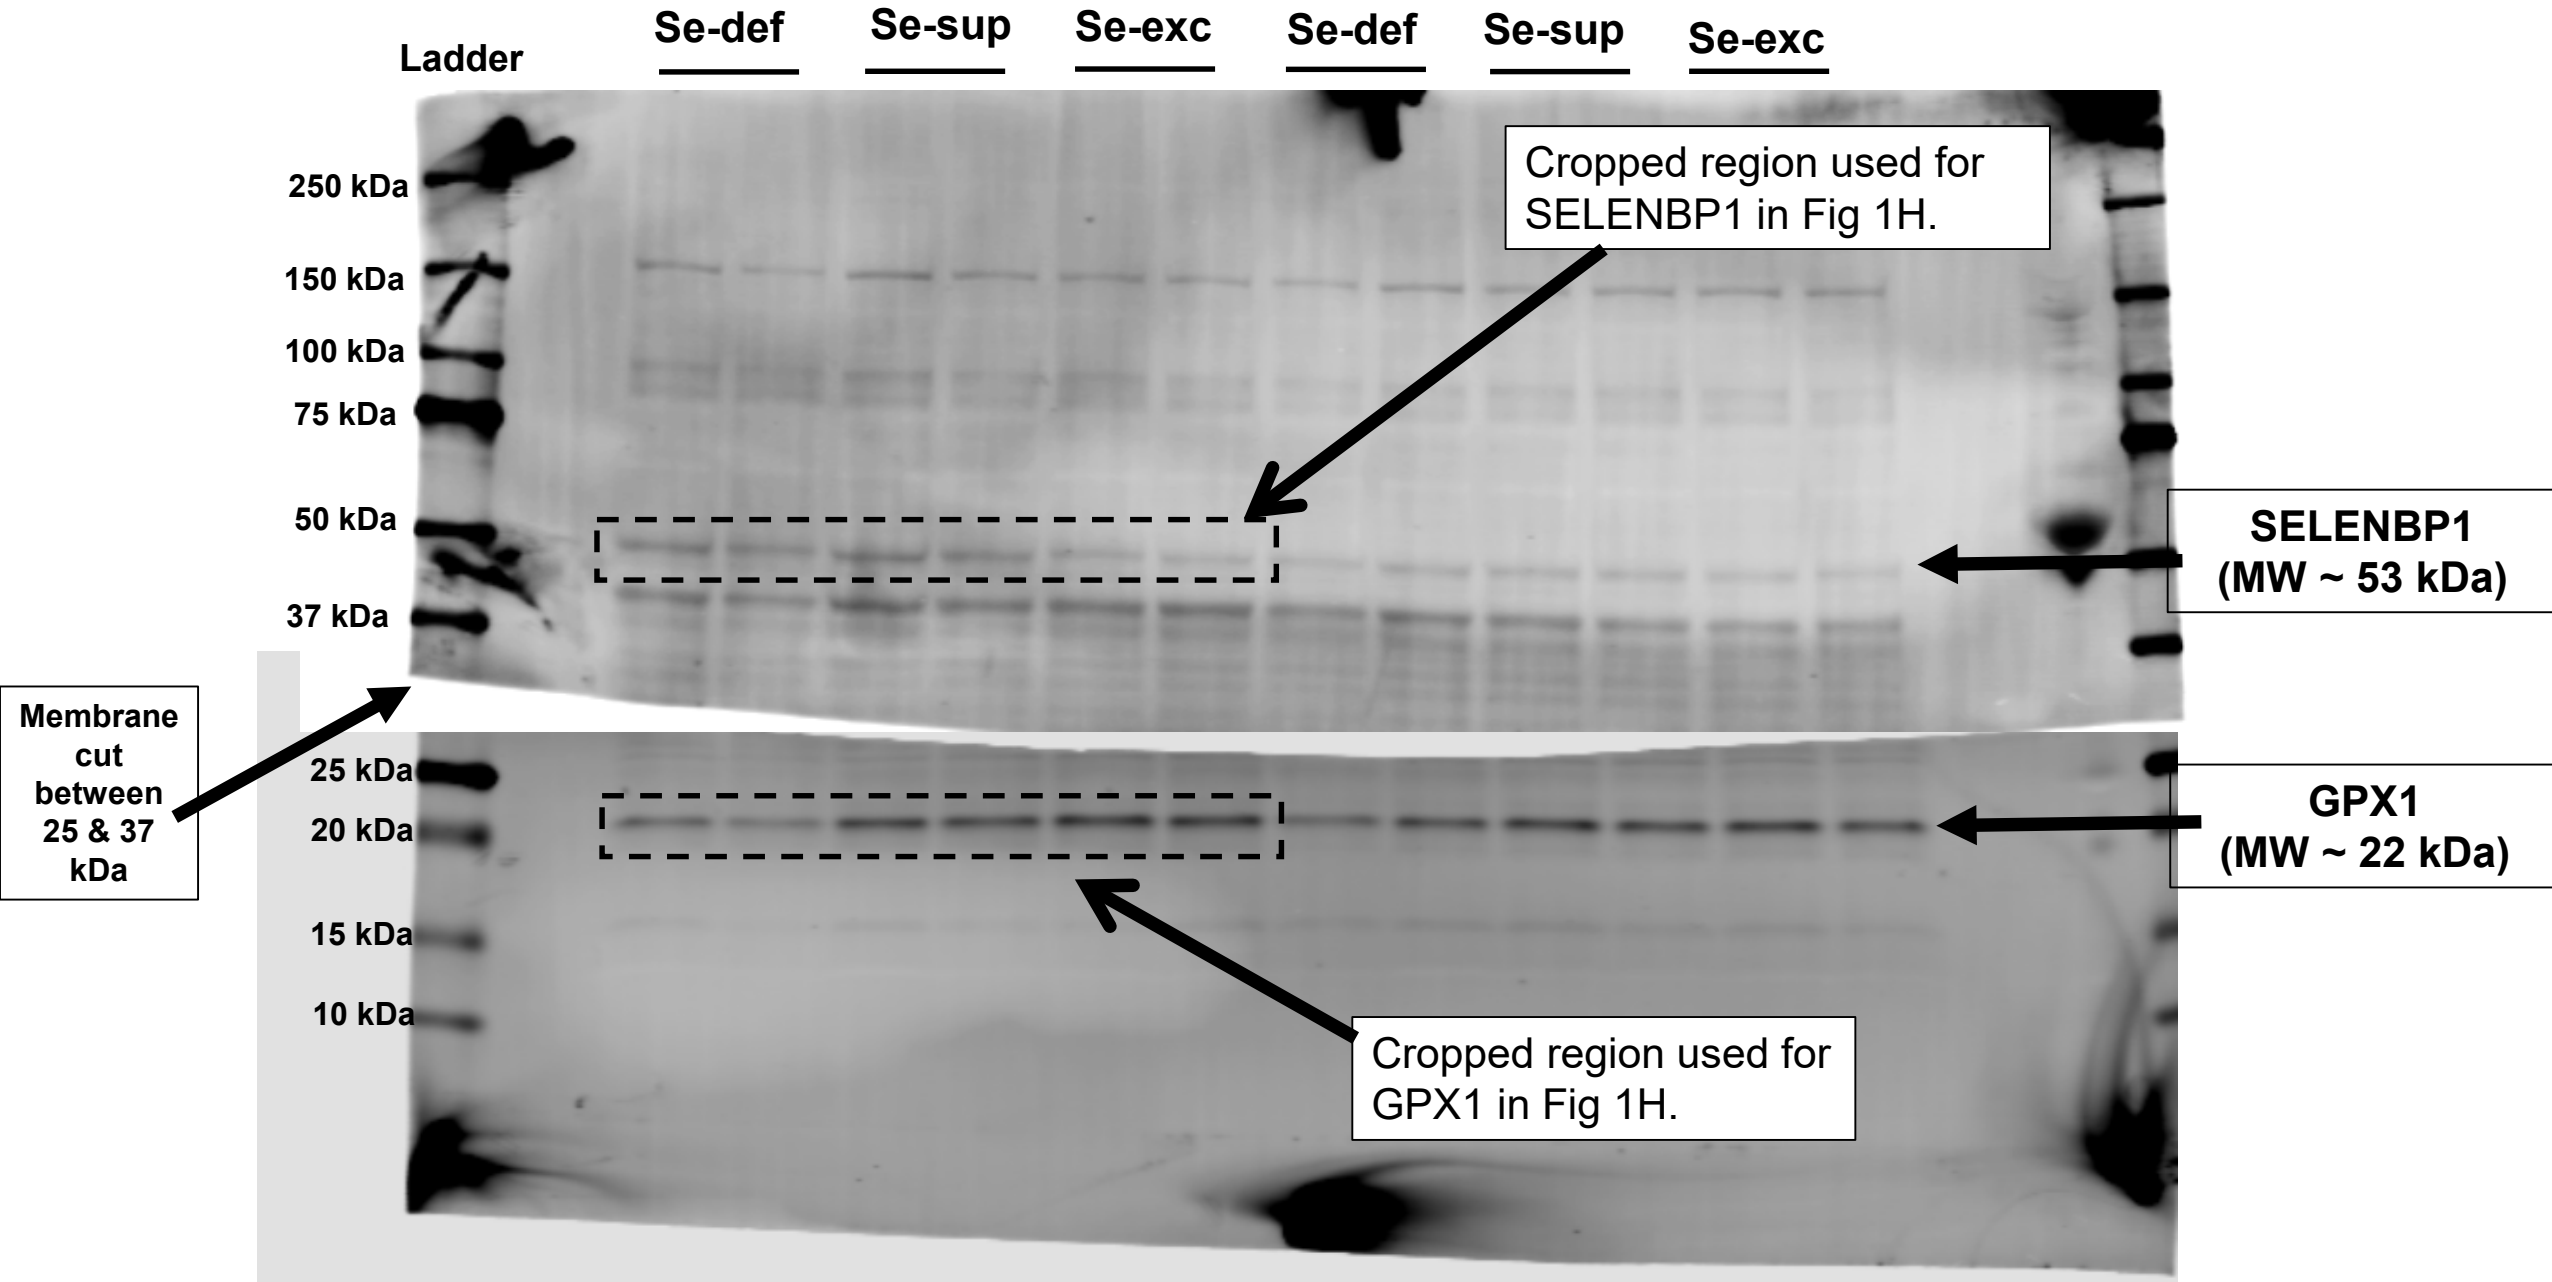

# Full Blot for Figure 1H: Initial Probe (800 channel)

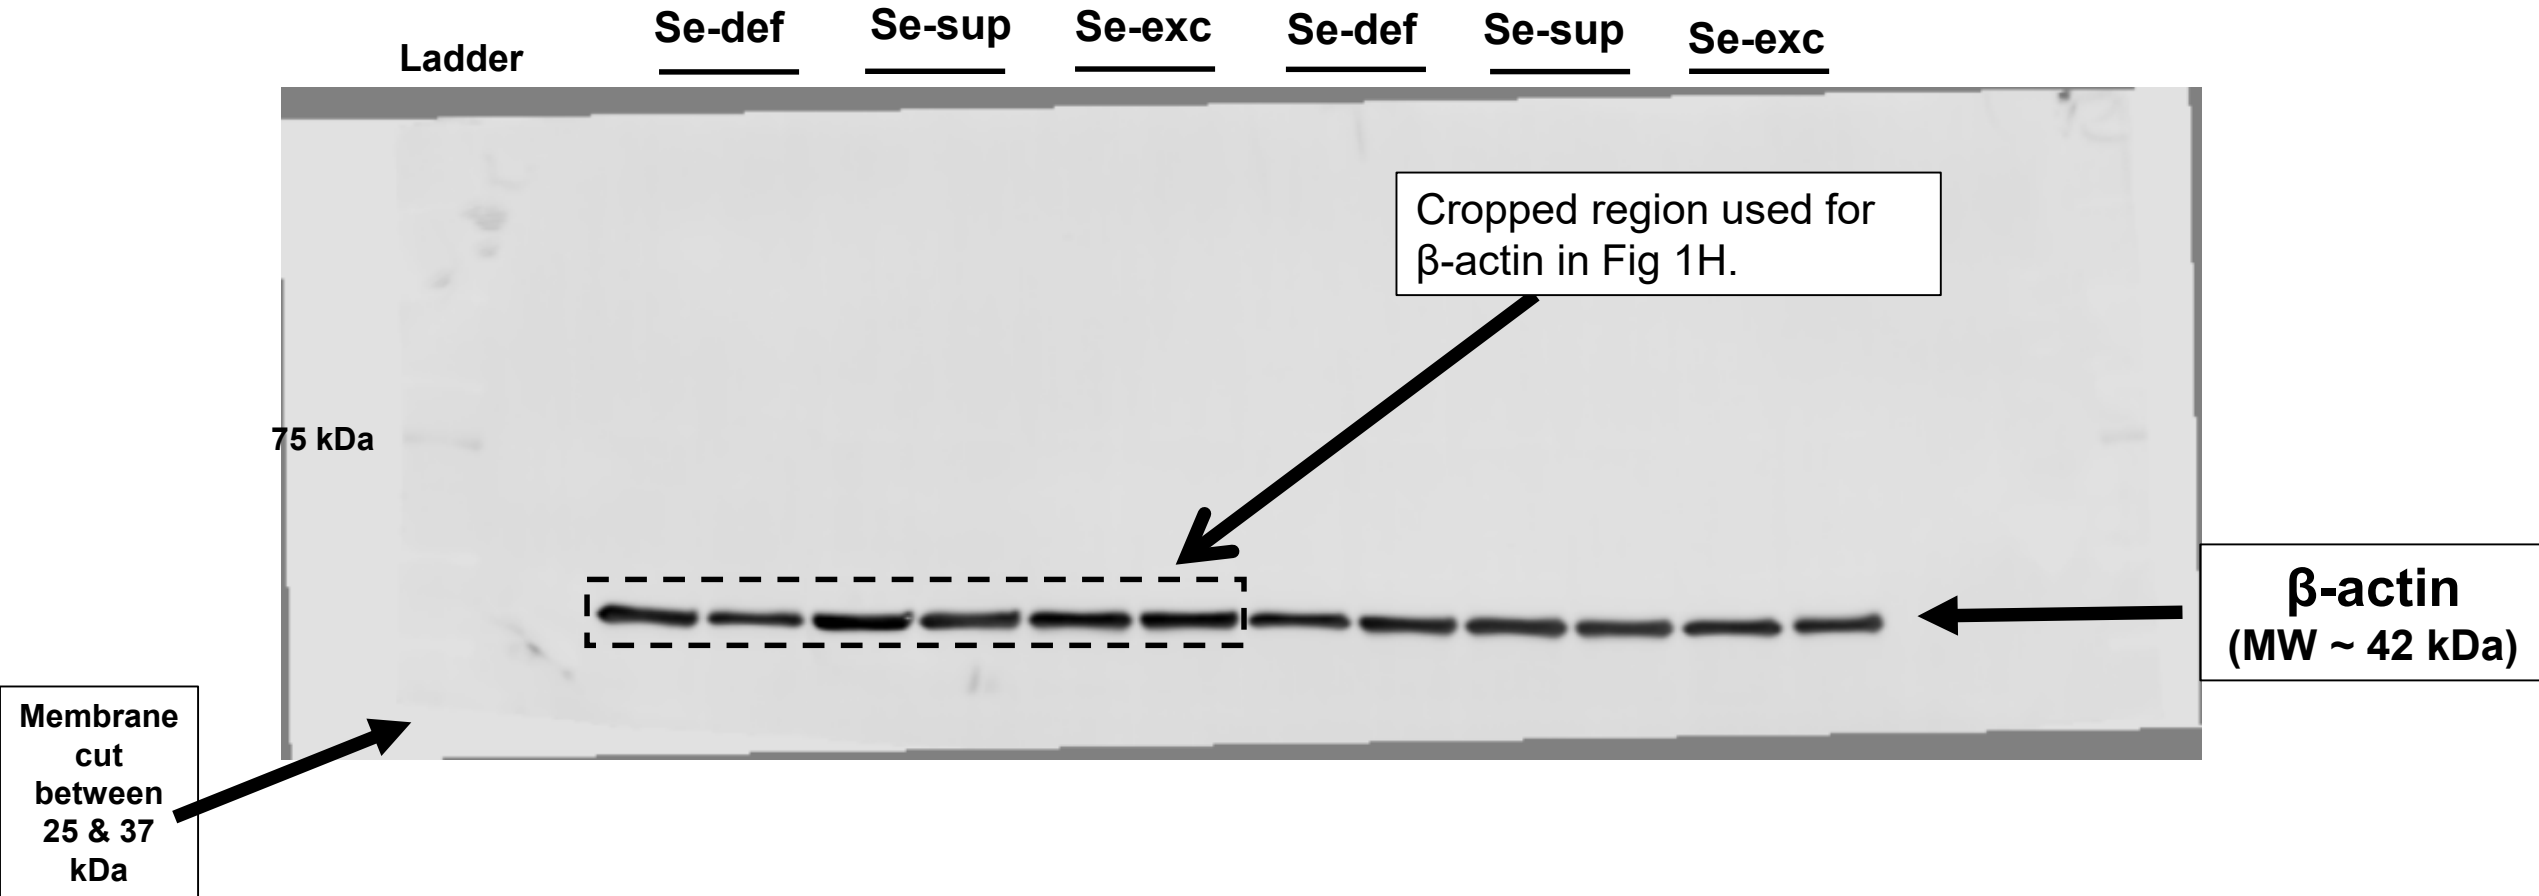

NOTE:  $\beta$ -actin was detected in the 800 channel of the Licor Odyssey System. Due to the intense signal of  $\beta$ -actin, the 75 kDa band of the ladder was barely visible.

# Full Blot for Figure 1H: Reprobe #1

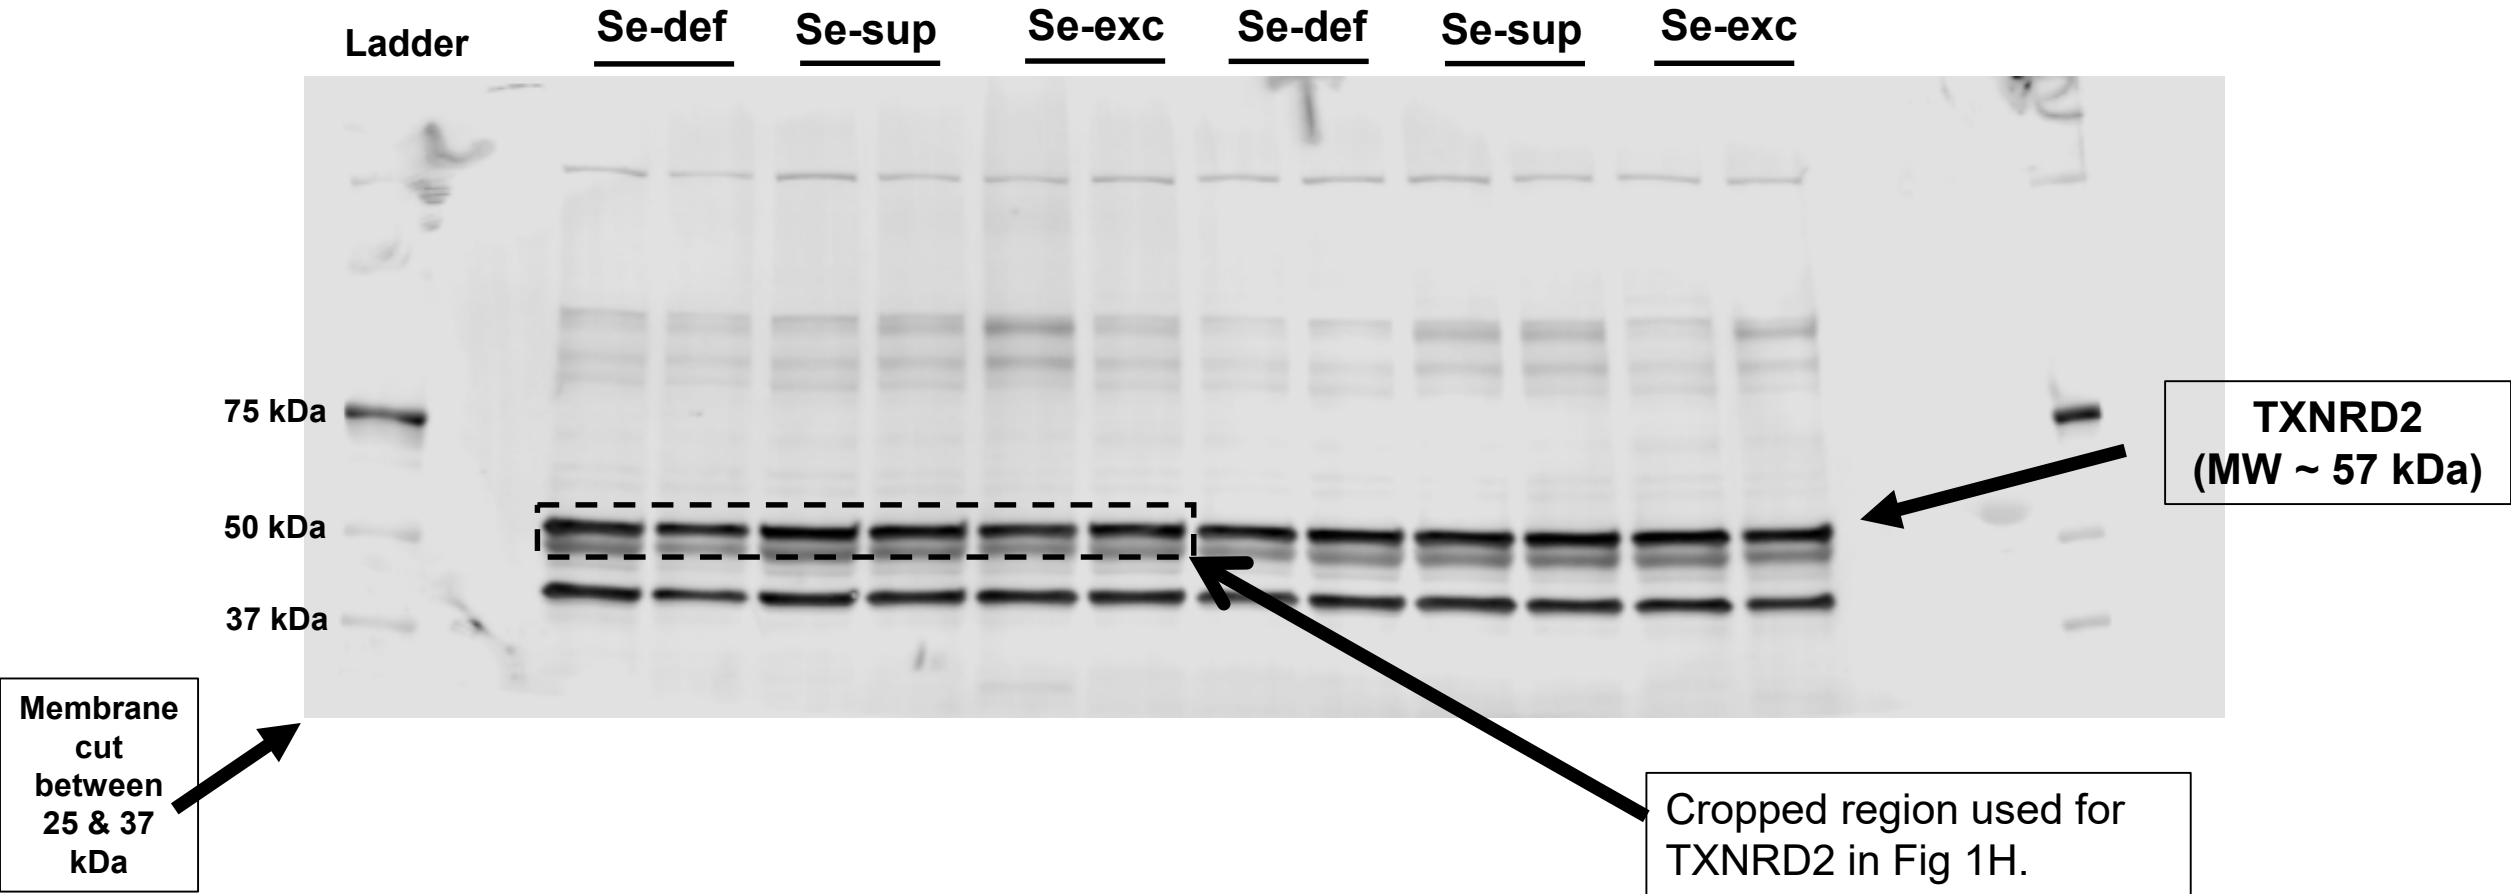

Supplement: Supplementary file [file 27921036]
